# Supplementary material
Source: PubMed Central journal article supplement (PMC10768718)
Supplement: NIHMS1951285-supplement-Figure_S1.pdf [file NIHMS1951285-supplement-Figure_S1.pdf]

## Supplementary Figures

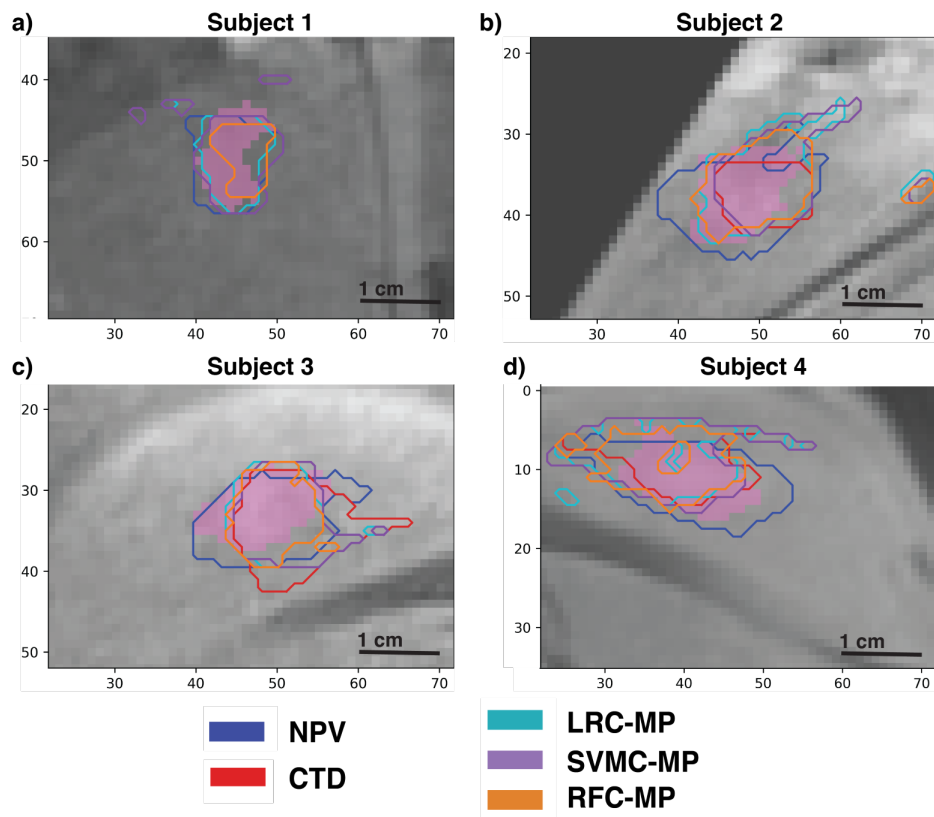

**Figure S1.** Pre-contrast 1-mm isotropic T1-weighted 2D coronal cross-sections of quadricep muscles located near the center of the ablated lesion with the voxel-wise histology necrosis label (light pink overlay). Contours of the acute NPV and LOO-trained optimized CTD and MPMR biomarkers in each test subjects 1-4 (from a) to d), respectively). For scale, the x- and y- axes are in [mm].
